# Supplementary material for: New insight into the alcohol induced conformational change and aggregation of the alkaline unfolded state of bovine β-lactoglobulin
Source: Royal Society of Chemistry journal article supplement (doi:10.1039/c6ra12057a), 2016-01-01
Supplement: c6ra12057a1.pdf [file c6ra12057a1.pdf]

## Supplementary Information

### New insight into the alcohol induced conformational change and aggregation of alkaline unfolded state of bovine $\beta$ -lactoglobulin

Sanhita Maity, Subrata Sardar, Sampa Pal, Hasan Parvej, Jishnu Chakraborty and Umesh C. Halder\*

**2.1. Materials** Bovine  $\beta$ -lactoglobulin ( $\beta$ -lg) was isolated and purified from cow milk as described earlier.<sup>33</sup> Methanol and different fluorescent probes, viz., 8-anilino-naphthalene, 1-sulfonic acid ammonium salt (ANS), Congo Red (CR) as well as Thioflavin T (ThT) were obtained from Sigma Chemical Co. (St. Louis, USA) and used as received without further purification. 2-Propanol (IP), *t*-butanol, sodium phosphate dibasic, glycine and KOH were purchased from Merck (Mumbai, India) (all were AR grade). 2, 2, 2-trifluoroethanol (TFE) (spectroscopic grade) was purchased from Spectrochem Pvt. Ltd. (India). The other chemicals used were of highest purity available.

#### 2.2. Methods and instrumentation

##### 2.2.1. Protein samples preparation

All the measurements were carried out at room temperature. Since the extinction coefficient of  $\beta$ -lg ( $0.96\text{mg}^{-1}\text{ml}^{-1}\text{cm}^{-1}$  at 280 nm) is known, different concentrations of protein samples were prepared by dissolving  $\beta$ -lg samples in buffer solution of pH 10.5. All the experiments for native  $\beta$ -lg were performed in 10 mM sodium phosphate buffer pH 7.0. For the study at alkaline pH,  $\beta$ -lg was dissolved in 3 mM glycine-KOH buffer of pH 10.5 respectively to give a stock solution of (271  $\mu\text{M}$ ) in each case. To the stock protein solutions, different volumes of buffer were added first, followed by the addition of methanol, 2-propanol, *t*-butanol and TFE (assumed to be 100%, v/v) to get a desired concentration of co-solvent in each case. The final solution mixture (1.0 ml) was incubated for 4 h at room temperature before each experiment. The required protein concentrations were adjusted in each experiment.

##### 2.2.2. Intrinsic fluorescence study

Fluorescence measurements were performed on a Shimadzu spectrofluorimeter (Shimadzu 5301 PC). The fluorescence spectra were collected at 25 °C using 1 cm path-length cell and protein concentration 13.6  $\mu\text{M}$  in absence and presence of different non-fluorinated and fluorinated alcohols. The excitation and emission slits were set at 5 nm. Intrinsic fluorescence spectra were recorded in the wavelength region 310 to 400 nm after exciting the protein sample at wavelength of 295 nm.

##### 2.2.3. 1-Anilino-naphthalene-8-sulfonate (ANS) fluorescence studies to monitor the hydrophobicity

Exposure of hydrophobic patches in protein during the aggregation process was monitored using polarity sensitive fluorescent probe 1-Anilino-naphthalene-8-sulfonate (ANS).<sup>34</sup> A stock solution of ANS was added to each aliquot of  $\beta$ -lg solution (both in absence and presence of different non-fluorinated and fluorinated alcohols) so that the final ANS concentration in each aliquot was 30  $\mu\text{M}$ . Typically, ANS concentration was 50 molar excess of protein concentration. The ANS-fluorescence intensities were measured using Shimadzu RF-5301 PC with excitation at 370 nm<sup>35, 36</sup> and scanning the emission wavelength from 400 nm to 650 nm. Slit widths were set at 5 nm for both excitation and emission. Each spectrum was blank corrected. Data points were the average of triplicate measurements.

#### **2.2.4. Thioflavin T (Th T) assay**

ThT is a dye which shows enhanced fluorescence at 480 nm when bound to amyloid fibrils.<sup>37</sup> Thus to investigate and compare the aggregates formed by  $\beta$ -lg in presence of various non-fluorinated and fluorinated alcohols, the following assay was employed. Briefly 250  $\mu$ L of  $\beta$ -lg samples having concentration 1mg/ ml was taken. It was then added to 40  $\mu$ L Th T solution (stock 3.13 mM ThT in 10 mM sodium phosphate buffer, pH 7.0) containing a mixture of buffer and varying amount of different alcohols, mixed thoroughly and incubated for 30 min.<sup>38</sup> The final concentration of protein was 6.8  $\mu$ M while the concentration of Th T was 30  $\mu$ M. The assay solution was excited at 450 nm<sup>39</sup> and the emissions were measured over the range 460 to 600 nm. Slit widths for both excitation and emission were kept at 5 nm. Three replicates were performed and the data were averaged.

#### **2.2.5. Congo red assay**

The formation of aggregates in presence of alcohols was probed by measuring the shift in absorbance of Congo red in the region 400–650 nm. For this experiment, 240  $\mu$ L (27.2  $\mu$ M) aliquots of the protein solutions were withdrawn and mixed with 260  $\mu$ L of a solution containing 40  $\mu$ M Congo red solution. Final volume (2 ml) was adjusted with 3mM glycine-KOH buffer of pH 10.5 and varying concentrations of various non-fluorinated and fluorinated alcohols.<sup>40</sup>

#### **2.2.6. Analysis of secondary structures by CD Spectroscopy**

To investigate the conformational changes of  $\beta$ -lg in presence of different non-fluorinated and fluorinated alcohols, circular dichroism measurements were carried out on a Jasco Spectropolarimeter (J-815) at 20°C in the far-UV region (190-260nm) using the rectangular cell of 1mm path length. The  $\beta$ -lg solutions equilibrated separately with non-fluorinated and fluorinated alcohols having protein concentration 13.6  $\mu$ M. All the spectra are average of three scans. The final spectrum was obtained after the subtraction of corresponding solvent spectrum. The far UV-CD curves were fitted into a curve-fitting program CDNN 2.1 to determine the amount of secondary structures present in  $\beta$ -lg in presence of methanol, 2-propanol, *t*-butanol and TFE acting as co-solvents.

#### **2.2.7. Dynamic Light Scattering (DLS) measurements**

The diffusion of nano sized particulates in solution induces fluctuations in the intensity of the scattered light. DLS detects these fluctuations using an auto correlator on a microsecond time scale and is used to analyze the distribution of the molecules and supramolecular aggregates as it is very sensitive to particle size.<sup>41</sup> Different sizes of molecules in the solution can be observed in different peaks provided their sizes vary sufficiently. In our experiment, DLS measurements were performed with  $\beta$ -lg solutions in absence and presence of Methanol, 2-propanol, *t*-butanol and TFE employing Zetasizer Nanos (Malvern Instrument, U.K.) equipped with 633 nm laser and using 2 ml rectangular cuvette (path length 10 mm). Measurements were done at 20°C taking 250  $\mu$ L of  $\beta$ -lg sample in 1.75 ml 3mM glycine-KOH buffers of pH 10.5. Then different amounts of non-fluorinated and fluorinated alcohols were mixed thoroughly and allowing to equilibrate the solutions. The time-dependent auto correlation function was acquired with twelve acquisitions for each run. Each data is an average of five such acquisitions.

#### **2.2.8 Monitoring of secondary structure of $\beta$ -lg during aggregation by FT-IR spectroscopy**

For FT-IR measurements, 50  $\mu$ L  $\beta$ -lg sample solutions (in absence and presence of Methanol, 2-propanol, *t*-butanol and TFE) having concentrations (1087  $\mu$ M) were taken in a microcon filter device and diluted with 200  $\mu$ L of D<sub>2</sub>O. It was then quickly centrifuged at 4000 $\times$ g for 8 min until the volume reached  $\sim$  50  $\mu$ L. After that 200  $\mu$ L of D<sub>2</sub>O was added again and centrifuged for another 8–10 min. This process of D<sub>2</sub>O exchange was repeated 3-4 times.<sup>39</sup> Finally, the D<sub>2</sub>O exchanged  $\beta$ -lg samples were placed between two CaF<sub>2</sub> windows separated by a 50  $\mu$ m thick teflon spacer. FT-IR scans were collected in the range of 1550–1750 cm<sup>-1</sup> at a resolution of 2 cm<sup>-1</sup> in N<sub>2</sub> environment using a Spectrum 100 FT-IR spectrometer (Perkin Elmer). Spectrum of D<sub>2</sub>O at pD 7.0 was collected and subtracted from sample spectrum.

#### **2.2.9 Morphological studies with SEM and TEM**

##### **Field emission scanning electron microscope (FESEM)**

The morphology of the aggregates of  $\beta$ -lg generating from U<sub>A</sub> state in various alcoholic co-solvents at different concentrations were investigated using FE-SEM (Hitachi S-4800, JAPAN) operating with a voltage of 20kV. For this study the protein sample (U<sub>A</sub> state) was incubated with MeOH, *i*-PrOH, *t*-BuOH and TFE and the concentrations were maintained at 10  $\mu$ M. One drop of the

sample solution was taken on a glass slide. It was dried by slow evaporation in open air and then under vacuum and gold coated for imaging.

### Transmission electron microscopy (TEM)

The morphology and size of the aggregates of  $\beta$ -Ig obtained from  $U_A$  state after incubation separately with non-fluorinated and fluorinated alcohols were investigated by high resolution transmission electron microscopy (Jeol-HRTEM-2011, Tokyo, Japan) with an accelerating voltage of 80–85 kV in different magnifications. The sample solutions were diluted 50 times in 3mM glycine-KOH buffer of pH 10.5. A droplet of the diluted sample was put on a carbon coated copper grid of mesh size 300C (Pro Sci Tech). After 20s the droplet was removed with a filter paper followed by a droplet of 2% uranyl acetate (Sigma, Steinheim, Germany) solution put on the grid and finally removed after 15 s and left for air dry and used for imaging purpose. Before taking the image all the samples were incubated 6 h.

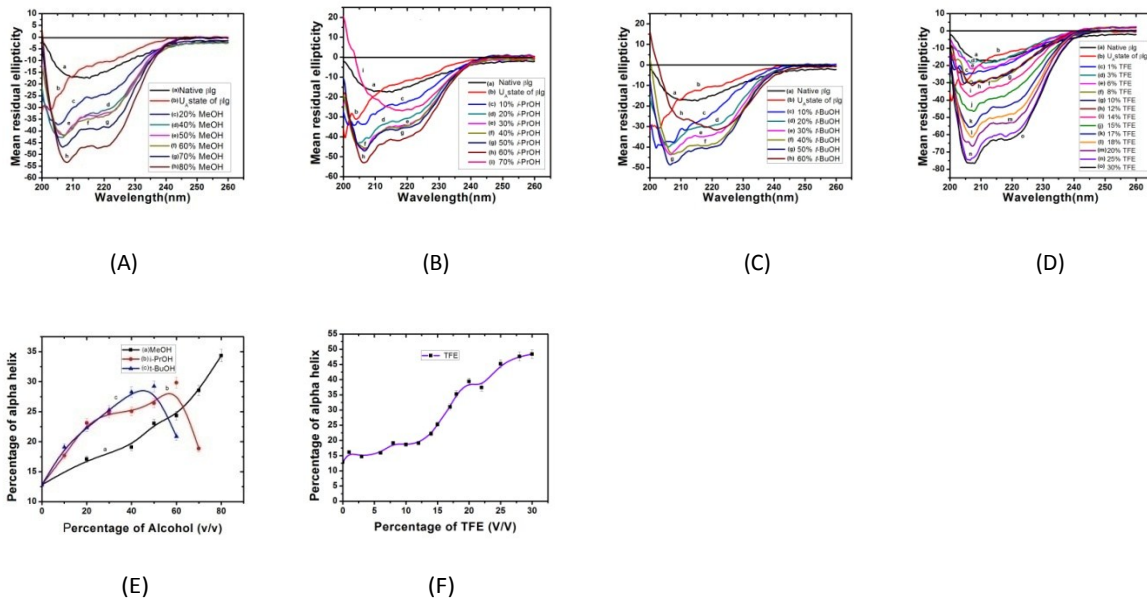

**Fig.1.** Far-UV CD spectra of  $\beta$ -Ig (13.6  $\mu$ M) in native state in 10 mM sodium phosphate buffer pH-7.0 (curve a) and in alkaline unfolded state (curve b) in presence of 20%, 40%, 50%, 60%, 70% and 80% (v/v) MeOH (curve c-h) (A), 10-70% (v/v) *i*-PrOH (curve c-i) (B), 10-60% (v/v) *t*-BuOH (curve c-h) (C) and with 1%, 3%, 6%, 8%, 10%, 12%,14%,15%,17%, 18%, 20%,25% and 30% (v/v) TFE (curve c-o) (D) at pH 10.5 in 3mM glycine-KOH buffer. Percentage of  $\alpha$ -helix formed at 222 nm in the presence of MeOH, *i*-PrOH and *t*-BuOH (E) and TFE (F) in alkaline unfolded  $\beta$ -Ig. The far-UV CD spectra were recorded between 200 nm and 260 nm and the path length was 1 mm.

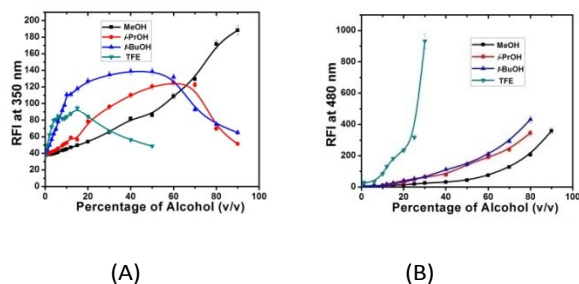

**Fig. 2.**(A) Normalized relative fluorescence intensity of tryptophenyl residues (emitted at 350 nm) of alkaline unfolded  $\beta$ -Ig (pH 10.5) with increasing concentrations of MeOH (a), *i*-PrOH (b), *t*-BuOH (c) and TFE (d), when the sample was excited at 295 nm. Protein concentration was 13.6  $\mu$ M. (B) Relative fluorescence intensity at 480nm of alkaline (pH

10.5) unfolded  $\beta$ -lg-ANS complex with increasing concentration of methanol (a), isopropanol (b), *t*-butanol (c) and TFE (d) after exciting at 370 nm.

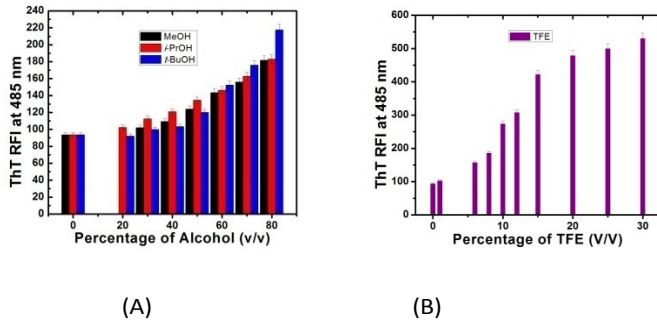

**Fig.3.** Bar diagram of the end-point ThT intensity versus (A) MeOH, *i*-PrOH and *t*-BuOH concentrations (B) TFE concentrations in Th T assay to study the aggregation of  $\beta$ -lg in 3mM glycine-KOH at pH 10.5 buffer. Fluorescence emissions were monitored in the wavelength range 460–600 nm after excitation at 450 nm. Standard deviations are within the range of  $\pm 3.0$ . A control experiment of ThT without  $\beta$ -lg has been performed.

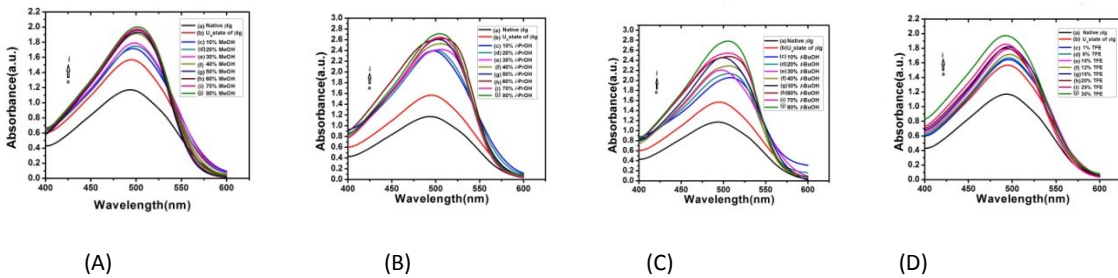

**Fig.4.** Congo red absorption spectra of  $\beta$ -lg in native state in 10 mM sodium phosphate buffer pH-7.0 (curve a) and in alkaline unfolded state (curve b) in 3mM glycine-KOH buffer at pH 10.5 in presence of (10-80%) (v/v) of MeOH (curve c-j) (A), *i*-PrOH (curve c-j) (B), *t*-BuOH (curve c-j) (C) with interval of 10 and in presence of 1%, 6%, 10%, 12%, 15%, 20%, 25% and 30% TFE (curve c-j) (D). The absorption spectra were recorded from 400 to 600 nm. The protein concentration was 27.2  $\mu$ M.

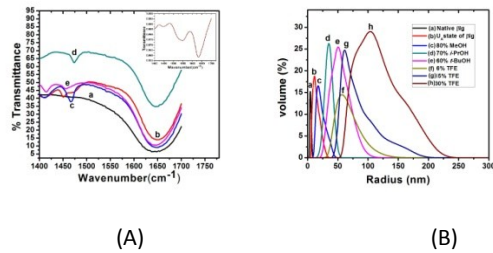

**Fig.5.** (A) Fourier transform infra red ( FTIR) spectra of alkaline unfolded  $\beta$ -lg (curve a) and native  $\beta$ -lg (inset), in the presence of 80% (v/v) MeOH (curve b), 70% (v/v) *i*-PrOH (curve c), 60% (v/v) *t*-BuOH (curve d) and 30% (v/v) TFE (curve e) respectively at pH 10.5 in 3mM glycine-KOH. Protein concentrations were 1087  $\mu$ M. Each spectrum is an average of 32 scans in D<sub>2</sub>O solvent at 25°C. (B) Number-particle size distribution profile of native  $\beta$ -lg (curve a), alkaline unfolded  $\beta$ -lg (curve b) in the presence of 80% (v/v) MeOH (curve c), 70% (v/v) *i*-PrOH (curve d), 60% (v/v) *t*-BuOH (curve e) and 6% (v/v), 15% (v/v) and 30% (v/v) (curve f-h) TFE respectively in same buffer. Each of these spectra is an average of 48 scans.

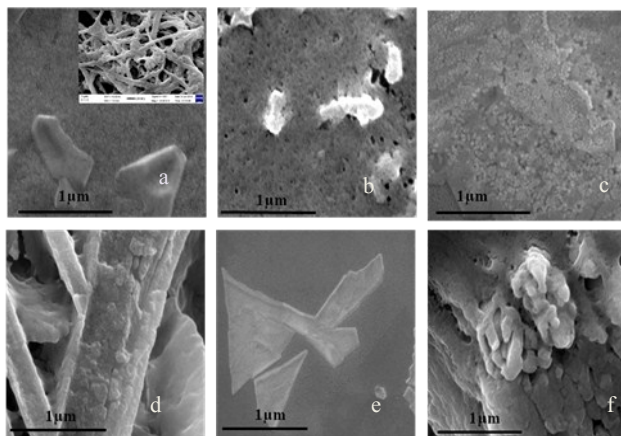

**Fig.6.** FE-SEM images showing the formation of distinct self assembled structure of  $\beta$ -Ig at pH 10.5 and at :  $\beta$ -Ig in absence of any alcohol(a) and native  $\beta$ -Ig(inset), worm-like aggregates of 50-60 nm diameter in 80% (v/v) MeOH (b), smaller spherical nanoparticles in 70% (v/v) *i*-PrOH (c), long sheet-like aggregates in 60% (v/v) *t*-BuOH (d), flake-like and nanotube-like morphology with 15% (v/v) (e) and 30% (v/v) TFE (f).

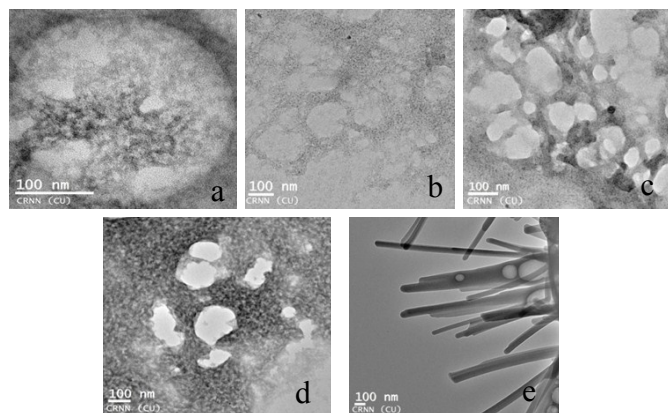

**Fig.7.** Selected TEM images of  $\beta$ -Ig aggregates at pH 10.5 and at 30°C:  $\beta$ -Ig in absence of any alcohol (a), amyloid fibrillar network in 80% (v/v) MeOH (b), nanovesicular-like structures in 70% (v/v) *i*-PrOH (c), spherical shaped nanoparticles in 60% (v/v) *t*-BuOH (d), formation of nanotube-like structures of the average thickness of 5 nm in 30% (v/v) TFE (e). Images were taken after 6 h incubation and the protein concentrations were 10 $\mu$ M.
